# Supplementary material
Source: publisher figshare collection journal article supplement (https://gsapubs.figshare.com/ndownloader/files/22757468)
Supplement: Supplementary file 1 [file 22757468]

## GSA DATA REPOSITORY ITEM 2006152

## APPENDIX 1: SAMPLE PREPARATION AND ANALYTICAL TECHNIQUES

**Apatite (U-Th)/He thermochronometry**

We collected modern fluvial sediment from Inyo Creek and Lone Pine Creeks where they exit the mountain front, three bedrock samples from each of the three plutons that outcrop in these catchments, and glacial sediment stored in a moraine low in the Lone Pine Creek catchment (see Fig. 2 for sample locations). Apatites were separated from these samples using conventional heavy-liquid and magnetic separation techniques and were sieved to a minimum dimension of 100-150  $\mu\text{m}$ . We hand picked euhedral and inclusion-free apatite grains under a 120x binocular microscope with cross polars (Fig. DR1), measured them for  $\alpha$  emission correction (Farley et al., 1996), loaded them into Pt capsules, and out-gassed them under a laser at 1100  $^{\circ}\text{C}$  for 5 minutes (House et al., 2000). Evolved helium was spiked with  $^3\text{He}$ , cryogenically concentrated and purified, and the  $^4\text{He}/^3\text{He}$  ratio measured on a quadrupole mass spectrometer. After out-gassing, the grains were retrieved, dissolved in  $\text{HNO}_3$ , spiked with  $^{235}\text{U}$  and  $^{230}\text{Th}$ , and Th and U isotope ratios analyzed by ICP-MS.

AHe ages for the bedrock and modern sediment samples are shown in Tables DR1 and DR2, respectively. We did not date any apatites from the moraine, but note that it contains numerous high-quality grains suitable for dating (Fig. DR1C).

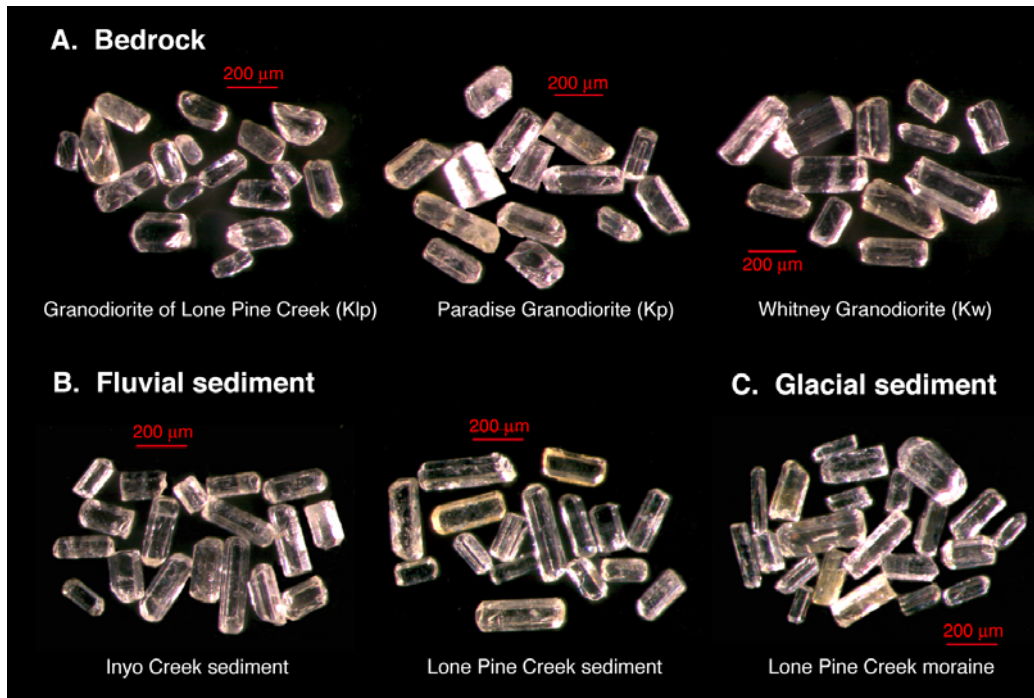

**Figure DR1.** Photomicrographs of representative apatite grains from the study area. A) Apatites from each of the three plutons outcropping in Inyo Creek and Lone Pine Creek catchments. B) Apatites from sediment collected from Inyo and Lone Pine Creeks. C) Apatites from a glacial moraine in the Lone Pine Creek catchment (Fig. 2). All grains show size and euhedral morphology appropriate for  $\alpha$ -ejection correction (Farley et al., 1996).

### Constructing and comparing predicted and measured AHe PDFs

We describe the distribution of AHe cooling ages in a detrital sample in terms of a synoptic probability density function (PDF), defined as the normalized summation of the individual grain age measurements ( $t_m$ ) and their associated  $1\sigma$  Gaussian uncertainties ( $\sigma_{tm}$ ):

$$PDF = \frac{\sum_{i=1}^n \left( \frac{1}{\sigma_{t_m} \sqrt{2\pi}} \right) e^{\frac{-(t-t_m)^2}{2\sigma_{t_m}^2}}}{n} \quad (1)$$

where  $n$  is the number of grains analyzed (Hodges et al., 2005; Ruhl and Hodges, 2005). We used a similar approach to construct predicted PDFs of AHe age distributions; we first fit a line through the age-elevation transect data (House et al., 1997, and this study), and then using this relationship to assign a “model” AHe age to each elevation in a 30 m digital elevation model (DEM) of the catchment. We assume that there is no lateral variation in bedrock AHe ages across our small study area (though see below). As described in the text, our assigned  $1\sigma$  uncertainty on the detrital AHe ages is 11%, based on the reproducibility of bedrock AHe ages collected from the ridge between Inyo Creek and Lone Pine Creek (Fig. 2). The bedrock AHe ages of House et al. (1997) were determined using a slightly different technique (groups of apatites rather than single grains) and thus their reported  $1\sigma$  uncertainty is less than 11%. We conservatively used the 11% value in generating the PDFs.

Following Ruhl and Hodges (2005), we statistically compared the predicted and measured PDFs using a two-sample Kuiper Equality test (Kuiper, 1962; Press et al., 1992). We then set up a Monte Carlo routine in which  $n$  ages ( $n = 52$  for Inyo Creek,  $n = 54$  for Lone Pine Creek) were randomly selected from the predicted PDF and compared with the measured PDF using the Kuiper test. We ran the Monte Carlo routine 10,000 times and compiled the test statistics. We repeated the process for  $n = 100$  ages selected from the predicted PDF. Mean Kuiper test statistics for the predicted and measured PDF comparisons are shown in Table DR3. These tests indicate that the measured PDF for the Inyo Creek catchment is statistically indistinguishable from the predicted PDF ( $H = 1$ ), i.e., the two distributions are the same at the 95% confidence interval. In contrast, the measured PDF for the Lone Pine Creek catchment is statistically different from the predicted PDF ( $H = 0$ ).

### Assessing the quality of AHe ages

In detrital samples from both Inyo and Lone Pine Creeks, there are several “outlier” AHe ages, i.e., ages that are outside ( $>2\sigma$ ) the range predicted by the hypsometry and age-elevation relationship. How to explain these outliers? The U concentration in the analyzed apatite grains is sufficiently distinctive to indicate pluton source. Specifically, the Lone Pine Creek granodiorite has a much higher [U] than either the Whitney or Paradise granodiorites (Fig. DR2). According to the geologic map (Fig. 2) and the bedrock age-elevation transect (Fig. 4A), the two youngest samples from the Lone Pine Creek detrital sample (02TELP05-025 and 02TELP05-041) have ages

consistent with derivation from either the Lone Pine Creek granodiorite (<20 Ma). However, their low [U] is consistent with either the Whitney or Paradise granodiorites, which should yield ages  $\geq 30$  Ma. These two grains must be giving erroneous ages, likely due to age resetting by wildfires. Both catchments are presently sparsely vegetated, and were apparently even less vegetated during glacial times (Woolfenden, 2003). This reduces the potential for wildfire resetting but does not eliminate entirely, especially for the lower parts of the catchment. Accordingly, we omitted these two ages from our analyses.

There are a number of apatites in the Inyo Creek detrital sample that derive from the Lone Pine Creek granodiorite (Fig. DR2). These grains are clearly the youngest (<~32 Ma), consistent with their low elevation source (Fig. 2). However, the situation is different in the detrital sample from Lone Pine Creek. Based on high [U], there appears to be only a single grain (02TELP05-013) that derives from the Lone Pine Creek granodiorite, with an age of ~40 Ma. This age is inconsistent with the mapped distribution of this pluton (Fig. 2); perhaps it is a grain with unusual chemistry from either the Whitney or Paradise granodiorites, or, less likely, it derives from an unmapped exposure of the Lone Pine Creek granodiorite or a similar pluton.

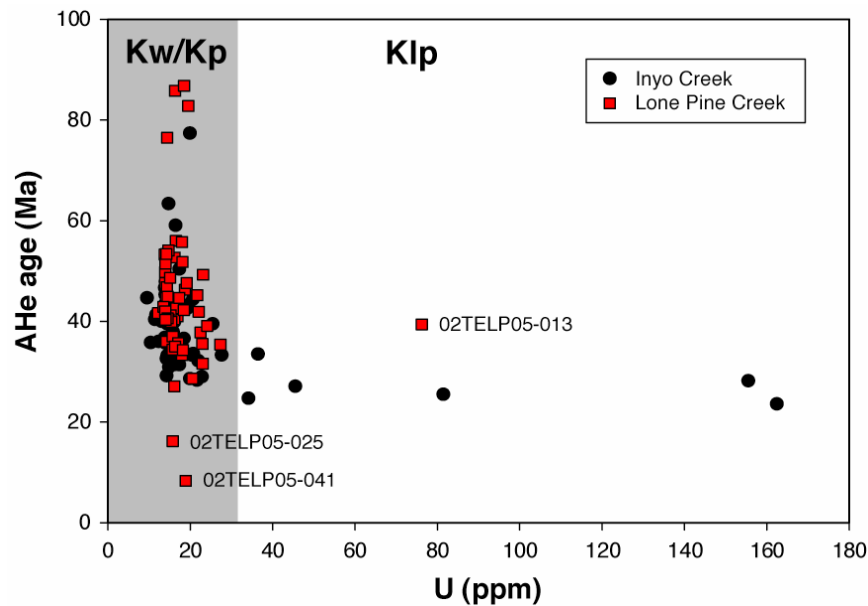

**Figure DR2.** Plot of U concentration versus AHe age. Gray shaded area represents the U concentration of the Whitney (Kw) and Paradise (Kp) granodiorites, white area the Lone Pine Creek granodiorite (Klp). Two youngest AHe ages from Lone Pine Creek have [U] consistent with either the Kw or Kp but AHe ages consistent with lower elevation Klp outcrop, suggesting forest fire resetting.

Fig. DR2 also illustrates the presence of 1-2 old outliers in both the Inyo and Lone Pine creek catchments. These may reflect apatites that contained non-detectable inclusions, or they may indicate the presence of minor three-dimensionality (i.e., lateral variation) in bedrock AHe ages across the catchments. This latter effect would result from isotherms that were not strictly horizontal during cooling, probably due to

paleotopography. If so, there may be unsampled outcrop areas with AHe ages older than the summit of Mt. Whitney. Such lateral variation in bedrock AHe ages has been well documented in the Sierra Nevada west and south of the study area (House et al., 1998; Clark et al., 2005). However, our bedrock samples collected from the ridge between Inyo and Lone Pine Creeks follow the trend established by those samples collected by House et al. (1997) from the Lone Pine Creek catchment (Fig. 4A), suggesting that lateral variation in ages is minor across our very small study area. Furthermore, this variation is within the 11%  $1\sigma$  uncertainty of our bedrock ages, and is thus accounted for in our statistical comparisons.

### Cosmogenic $^{10}\text{Be}$ -based catchment erosion rate

We separated out ~200 g of Inyo Creek sediment for cosmogenic  $^{10}\text{Be}$  analysis. The sediment was crushed and sieved to 0.25-0.85 mm, and quartz purified by selective chemical dissolution (Kohl and Nishiizumi, 1992). The sample was spiked with ~0.3 mg  $^9\text{Be}$  carrier ( $^{10}\text{Be}/^9\text{Be}=6\times 10^{-15}$ ). The quartz was then dissolved in concentrated HF and  $\text{HNO}_3$ , fluorides expelled with aqua regia fuming, and Be separated and purified by oxalic acid-based ion exchange chromatography and selective precipitation. BeOH precipitate was oxidized at  $1000^\circ\text{C}$ , mixed with Nb powder, and packed into a stainless steel cathode. The  $^{10}\text{Be}/^9\text{Be}$  ratio was measured by accelerator mass spectrometry at the Purdue Rare Isotope Measurement (PRIME) laboratory. Results are shown in Table DR4.

Calculating catchment-averaged erosion rate requires a mean nuclide production (neutron and muon) rate for the catchment. To determine this we first calculated a local production rate, scaled for latitude, altitude (as expressed by atmospheric pressure; Stone, 2000), and topographic shielding (Dunne et al, 1999), for each pixel of a 30 m DEM of the Inyo Creek catchment. In addition, we scaled the production rate for annual snow shielding using monthly local snowpack data (<http://cdec.water.ca.gov>) and modifying the formulation of Gosse and Phillips (2001):

$$S = \frac{1}{n} \sum_{i=1}^n e^{-(z_{\text{snow},i}) \rho_{\text{snow},i} / \Lambda} \quad (2)$$

where  $S$  is the snow shielding factor,  $z_{\text{snow},i}$  is the monthly average snow height (cm) above the ground surface, and  $\rho_{\text{snow},i}$  is the snowpack density. The interval of summation,  $i$ , was one month, and  $n$ , the total length of the summation time, was 12 (i.e., 1 year). We used snowpack data converted to snow water equivalent, so in this case  $z_{\text{snow},i}$  is the monthly average snow water equivalent height (cm) and  $\rho_{\text{snow},i}$  is the density of water.

We calculated the catchment erosion rate ( $\varepsilon$ ) by iteratively solving Eq. 3 (Granger et al., 2001):

$$N = \frac{P_n}{\tau^{-1} + \rho \varepsilon (\Lambda^{-1})} + \frac{YA_1}{\tau^{-1} + \rho \varepsilon (L_1^{-1})} + \frac{YA_2}{\tau^{-1} + \rho \varepsilon (L_2^{-1})} + \frac{B}{\tau^{-1} + \rho \varepsilon (L_3^{-1})} \quad (3)$$

where  $P_n$  is the sea level, high latitude  $^{10}\text{Be}$  production rate at the surface due to nucleon spallation ( $5.1 \pm 0.3 \text{ atm/g/yr}$ ; Stone, 2000) scaled as described above,  $\tau$  is the  $^{10}\text{Be}$  meanlife ( $2.18 \pm 0.09 \text{ Ma}$ ; Middleton et al., 1993),  $\rho$  is the bedrock density ( $2.7 \text{ g/cm}^3$ ),  $A$  is the neutron penetration depth for nucleons ( $160 \text{ g/cm}^2$ ; Masarik and Reedy, 1995),  $A_1$  and  $A_2$  are the production rates of negative muons ( $170.6 \text{ } \mu\text{g/yr}$  and  $36.8 \text{ } \mu\text{g/yr}$ , respectively; Granger and Smith, 2000),  $Y$  is the yield of  $^{10}\text{Be}$  per negative muon ( $5.6 \times 10^{-4} \text{ atm/}\mu^-$ ; Heisinger, 1998),  $B$  is the production rate of  $^{10}\text{Be}$  due to fast muons ( $0.026 \text{ atm/g/yr}$ ; Granger and Smith, 2000), and  $L_1$ ,  $L_2$ , and  $L_3$  are the penetration depths for muon reactions ( $738.6$ ,  $2688$ , and  $4360 \text{ g/cm}^2$ , respectively; Granger and Smith, 2000).

### Additional references

- Dunne, J., Elmore, D., and Muzikar, P., 1999, Scaling factors for the rates of production of cosmogenic nuclides for geometric shielding and attenuation at depth on sloped surfaces: *Geomorphology*, v. 27, p. 3-11.
- Farley, K.A., Wolf, R.W., and Silver, L.T., 1996, The effects of long-stopping distances on (U-Th)/He ages: *Geochimica et Cosmochimica Acta*, v. 60, p. 4223-4229.
- Granger, D.E., and Smith, A.L., 2000, Dating buried sediments using radioactive decay and muogenic production of  $^{26}\text{Al}$  and  $^{10}\text{Be}$ : *Nuclear Instruments and Methods in Physics Research B*, v. 172, p. 822-826.
- Granger, D.E., Riebe, C.S., Kirchner, J.W., and Finkel, R.C., 2001, Modulation of erosion on steep granitic slopes by boulder armoring, as revealed by cosmogenic  $^{26}\text{Al}$  and  $^{10}\text{Be}$ : *Earth and Planetary Science Letters*, v. 186, p. 269-281.
- Gosse, J.C., and Phillips, F.M., 2001, Terrestrial in situ cosmogenic nuclides: Theory and applications: *Quaternary Science Reviews*, v. 20, p. 1475-1560.
- Heisinger, B.P., 1998, Myonen-induzierte Produktion von Radionukliden. Ph.D. thesis, Technische Universitat Munchen.
- Hodges, K.V., Ruh, K.W., Wobus, C.W., and Pringle, M.S., 2005,  $^{40}\text{Ar}/^{39}\text{Ar}$  Thermochronology of Detrital Minerals, in Reiners, P.W., and Ehlers, T.A., eds., *Low-Temperature Thermochronology: Techniques, Interpretations, and Applications: Reviews in Mineralogy and Geochemistry*, v. 58, p. 239-257.
- House, M.A., Wernicke, B.P., and Farley, K.A., 1998, Dating topography of the Sierra Nevada, California, using apatite (U-Th)/He ages: *Nature*, v. 396, p. 66 – 69.
- House, M.A., Farley, K.A., and Stockli, D., 2000, Helium chronometry of apatite and titanite using Nd-YAG laser heating: *Earth and Planetary Science Letters*, v. 183, p. 365-368.
- Kohl, C.P., and Nishiizumi K., 1992, Chemical isolation of quartz for measurement of *in-situ*-produced cosmogenic nuclides: *Geochimica et Cosmochimica Acta*, v. 56, p. 3583-3587.
- Kuiper, N.H., 1962, Tests concerning random points on a circle: *Proceedings of the Koninklijke Nederlandse Akademie van Wetenschappen*, v. 63, p. 38-47.
- Masarik, J., and Reedy, R.C., 1995, Terrestrial cosmogenic nuclide production systematics calculated from numerical simulations: *Earth and Planetary Science Letters*, v. 136, p. 381-395.
- Press, W.H., Teukolsky, S.A., Vetterling, W.T., and Flannery, B.P., 1992, *Numerical Recipes in C: The Art of Scientific Computing*, 994 pp., Cambridge University Press, New York.
- Stone, J.O., 2000, Air pressure and cosmogenic isotope production: *Journal of Geophysical Research*, v. 105, p. 23,753-23,759.
- Woolfenden, W.B., 2003, A 180,000-year pollen record from Owens Lake, CA: Terrestrial vegetation change on orbital scales: *Quaternary Research*, v. 59, p. 430-444.

Table DR1. Bedrock apatite (U-Th)/He data from Inyo Creek and Lone Pine Creek catchments

| Sample                                 | Length<br>( $\mu\text{m}$ ) | Diameter<br>( $\mu\text{m}$ ) | U<br>(ppm)          | Th<br>(ppm) | He<br>(nmol/g)         | $F_t$                    | Raw age<br>(Ma) | Corrected<br>age (Ma)* | $\pm 1\sigma$<br>(Ma) |
|----------------------------------------|-----------------------------|-------------------------------|---------------------|-------------|------------------------|--------------------------|-----------------|------------------------|-----------------------|
| <u>Whitney Granodiorite</u>            |                             |                               | <u>Elev. 3088 m</u> |             | <u>Lat. 36.57626°N</u> | <u>Long. 118.22069°W</u> |                 |                        |                       |
| 05GS01Kw-001                           | 200                         | 95                            | 16.5                | 46.1        | 5.4                    | 0.72                     | 36.2            | 50.1                   |                       |
| 05GS01Kw-002                           | 194                         | 86                            | 18.4                | 49.7        | 4.1                    | 0.70                     | 25.1            | 36.0                   |                       |
| 05GS01Kw-003                           | 193                         | 74                            | 26.1                | 76.6        | 6.1                    | 0.66                     | 25.2            | 38.1                   |                       |
| 05GS01Kw-004                           | 231                         | 120                           | 13.5                | 38.4        | 3.7                    | 0.77                     | 29.9            | 38.6                   |                       |
| 05GS01Kw-005                           | 303                         | 119                           | 17.4                | 59.4        | 6.2                    | 0.78                     | 36.5            | 46.9                   |                       |
| <i>Mean</i>                            |                             |                               |                     |             |                        |                          |                 | 41.9                   | 6.1                   |
| <u>Paradise Granodiorite</u>           |                             |                               | <u>Elev. 2839 m</u> |             | <u>Lat. 36.58050°N</u> | <u>Long. 118.21688°W</u> |                 |                        |                       |
| 05GS02Kp-001                           | 174                         | 90                            | 28.7                | 83.6        | 6.0                    | 0.71                     | 22.9            | 32.4                   |                       |
| 05GS02Kp-002                           | 152                         | 90                            | 15.9                | 43.0        | 2.9                    | 0.73                     | 20.6            | 28.0                   |                       |
| 05GS02Kp-004                           | 159                         | 112                           | 16.1                | 44.1        | 3.2                    | 0.73                     | 22.0            | 30.1                   |                       |
| 05GS02Kp-005                           | 176                         | 90                            | 16.4                | 44.7        | 3.4                    | 0.70                     | 23.3            | 33.1                   |                       |
| <i>Mean</i>                            |                             |                               |                     |             |                        |                          |                 | 30.9                   | 2.3                   |
| <u>Granodiorite of Lone Pine Creek</u> |                             |                               | <u>Elev. 2320 m</u> |             | <u>Lat. 36.58819°N</u> | <u>Long. 118.20758°W</u> |                 |                        |                       |
| 05GS03Klp-001                          | 278                         | 167                           | 54.2                | 65.5        | 10.3                   | 0.84                     | 27.1            | 32.4                   |                       |
| 05GS03Klp-002                          | 137                         | 92                            | 92.9                | 149.7       | 13.2                   | 0.71                     | 19.0            | 26.9                   |                       |
| 05GS03Klp-003                          | 201                         | 83                            | 172.2               | 269.9       | 23.1                   | 0.70                     | 18.0            | 25.9                   |                       |
| 05GS03Klp-004                          | 207                         | 108                           | 66.5                | 68.4        | 8.7                    | 0.76                     | 19.4            | 25.6                   |                       |
| 05GS03Klp-005                          | 152                         | 105                           | 58.6                | 68.8        | 8.1                    | 0.74                     | 19.9            | 26.8                   |                       |
| <i>Mean</i>                            |                             |                               |                     |             |                        |                          |                 | 27.5                   | 2.8                   |

\* Corrected for alpha ejection after Farley et al. (1996)

Table DR2. Detrital apatite (U-Th)/He data from Inyo Creek and Lone Pine Creek catchments

| Sample            | Length<br>( $\mu\text{m}$ ) | Diameter<br>( $\mu\text{m}$ ) | U<br>(ppm)          | Th<br>(ppm) | He<br>(nmol/g)         | $F_t$                    | Raw age<br>(Ma) | Corrected<br>age (Ma)* | $\pm 1\sigma$<br>(Ma)† |
|-------------------|-----------------------------|-------------------------------|---------------------|-------------|------------------------|--------------------------|-----------------|------------------------|------------------------|
| <u>Inyo Creek</u> |                             |                               | <u>Elev. 1950 m</u> |             | <u>Lat. 36.59243°N</u> | <u>Long. 118.19755°W</u> |                 |                        |                        |
| 02TEIC01-001      | 464                         | 127                           | 10.4                | 34.5        | 2.9                    | 0.79                     | 28.5            | 35.8                   | 3.9                    |
| 02TEIC01-002      | 420                         | 136                           | 14.1                | 45.3        | 4.6                    | 0.81                     | 34.3            | 42.5                   | 4.6                    |
| 02TEIC01-003      | 233                         | 118                           | 14.8                | 43.2        | 3.2                    | 0.77                     | 23.8            | 30.9                   | 3.3                    |
| 02TEIC01-004      | 276                         | 137                           | 17.9                | 52.2        | 5.7                    | 0.80                     | 34.7            | 43.4                   | 4.7                    |
| 02TEIC01-007      | 310                         | 137                           | 13.9                | 45.6        | 4.9                    | 0.80                     | 36.4            | 45.3                   | 4.9                    |
| 02TEIC01-008      | 195                         | 126                           | 16.0                | 40.5        | 3.3                    | 0.77                     | 24.0            | 31.4                   | 3.3                    |
| 02TEIC01-010      | 381                         | 146                           | 16.1                | 41.2        | 4.6                    | 0.82                     | 32.6            | 39.9                   | 4.3                    |
| 02TEIC01-011      | 273                         | 131                           | 17.3                | 55.3        | 4.1                    | 0.79                     | 24.9            | 31.4                   | 3.4                    |
| 02TEIC01-014      | 209                         | 152                           | 14.4                | 35.6        | 3.2                    | 0.81                     | 25.9            | 33.2                   | 3.4                    |
| 02TEIC01-015      | 297                         | 120                           | 27.6                | 78.8        | 6.5                    | 0.78                     | 25.9            | 33.3                   | 3.6                    |
| 02TEIC01-016      | 296                         | 217                           | 11.7                | 29.1        | 3.6                    | 0.86                     | 35.8            | 41.3                   | 4.5                    |
| 02TEIC01-017      | 232                         | 132                           | 25.4                | 47.4        | 6.2                    | 0.79                     | 31.3            | 39.5                   | 4.3                    |
| 02TEIC01-018      | 269                         | 160                           | 13.8                | 43.1        | 5.0                    | 0.82                     | 38.5            | 46.7                   | 5.0                    |
| 02TEIC01-019      | 228                         | 112                           | 19.9                | 54.4        | 3.9                    | 0.76                     | 21.8            | 28.6                   | 3.1                    |
| 02TEIC01-020      | 339                         | 107                           | 20.6                | 61.6        | 6.4                    | 0.76                     | 33.7            | 44.4                   | 4.8                    |
| 02TEIC01-022      | 232                         | 161                           | 21.9                | 24.6        | 4.0                    | 0.83                     | 26.6            | 32.2                   | 3.5                    |
| 02TEIC01-023      | 250                         | 134                           | 16.0                | 47.3        | 4.3                    | 0.79                     | 28.9            | 36.4                   | 3.9                    |
| 02TEIC01-024      | 196                         | 139                           | 36.4                | 63.9        | 7.5                    | 0.80                     | 26.7            | 33.5                   | 3.6                    |
| 02TEIC01-025      | 161                         | 128                           | 15.4                | 47.9        | 3.7                    | 0.77                     | 25.5            | 33.0                   | 3.6                    |
| 02TEIC01-026      | 352                         | 117                           | 13.8                | 40.2        | 3.6                    | 0.78                     | 28.6            | 36.8                   | 4.0                    |
| 02TEIC01-027      | 202                         | 139                           | 14.4                | 47.6        | 4.4                    | 0.79                     | 31.4            | 39.5                   | 4.3                    |
| 02TEIC01-028      | 204                         | 105                           | 17.3                | 42.3        | 5.6                    | 0.74                     | 37.5            | 50.4                   | 5.4                    |

|                        |                     |     |                        |       |                          |      |      |      |     |
|------------------------|---------------------|-----|------------------------|-------|--------------------------|------|------|------|-----|
| 02TEIC01-029           | 302                 | 77  | 16.2                   | 47.3  | 3.6                      | 0.68 | 24.0 | 35.2 | 3.8 |
| 02TEIC01-030           | 373                 | 121 | 14.2                   | 40.4  | 3.0                      | 0.79 | 23.0 | 29.2 | 3.2 |
| 02TEIC01-031           | 191                 | 115 | 15.5                   | 45.4  | 3.5                      | 0.76 | 24.9 | 32.8 | 3.5 |
| 02TEIC01-032           | 134                 | 111 | 19.9                   | 55.6  | 10.3                     | 0.74 | 57.4 | 77.4 | 8.4 |
| 02TEIC01-033           | 164                 | 116 | 18.4                   | 48.7  | 4.5                      | 0.76 | 27.7 | 36.6 | 4.0 |
| 02TEIC01-034           | 338                 | 181 | 20.7                   | 52.2  | 5.1                      | 0.85 | 28.5 | 33.6 | 3.6 |
| 02TEIC01-035           | 144                 | 103 | 22.8                   | 52.2  | 4.0                      | 0.73 | 21.2 | 29.0 | 3.1 |
| 02TEIC01-036           | 155                 | 104 | 14.0                   | 41.4  | 4.5                      | 0.73 | 35.1 | 47.9 | 5.2 |
| 02TEIC01-037           | 314                 | 129 | 81.4                   | 124.2 | 12.2                     | 0.80 | 20.3 | 25.5 | 2.8 |
| 02TEIC01-038           | 226                 | 170 | 21.6                   | 43.3  | 4.1                      | 0.83 | 23.6 | 28.3 | 3.1 |
| 02TEIC01-039           | 444                 | 171 | 16.9                   | 50.6  | 4.8                      | 0.84 | 30.4 | 36.0 | 3.9 |
| 02TEIC01-041           | 324                 | 107 | 16.4                   | 49.2  | 6.8                      | 0.76 | 44.9 | 59.1 | 6.4 |
| 02TEIC01-042           | 175                 | 114 | 20.3                   | 49.2  | 4.4                      | 0.76 | 25.2 | 33.3 | 3.6 |
| 02TEIC01-043           | 176                 | 132 | 155.5                  | 106.4 | 21.9                     | 0.79 | 22.3 | 28.2 | 3.0 |
| 02TEIC01-044           | 177                 | 96  | 16.5                   | 38.5  | 3.3                      | 0.72 | 23.3 | 32.3 | 3.5 |
| 02TEIC01-045           | 231                 | 119 | 162.4                  | 134.1 | 19.4                     | 0.78 | 18.4 | 23.6 | 2.6 |
| 02TEIC01-046           | 267                 | 99  | 45.5                   | 74.9  | 6.9                      | 0.74 | 20.1 | 27.1 | 2.9 |
| 02TEIC01-047           | 288                 | 161 | 34.1                   | 68.4  | 5.6                      | 0.83 | 20.5 | 24.7 | 2.7 |
| 02TEIC01-048           | 187                 | 141 | 11.4                   | 34.6  | 3.4                      | 0.79 | 32.0 | 40.4 | 4.4 |
| 02TEIC01-049           | 240                 | 144 | 16.7                   | 40.9  | 5.1                      | 0.81 | 35.7 | 44.2 | 4.8 |
| 02TEIC01-050           | 272                 | 125 | 12.3                   | 32.6  | 3.1                      | 0.79 | 28.3 | 36.0 | 3.9 |
| 02TEIC01-051           | 224                 | 163 | 13.9                   | 37.3  | 3.6                      | 0.82 | 29.4 | 35.7 | 3.9 |
| 02TEIC01-052           | 174                 | 138 | 14.2                   | 38.2  | 3.2                      | 0.79 | 25.7 | 32.6 | 3.5 |
| 02TEIC01-053           | 281                 | 107 | 16.2                   | 43.2  | 3.7                      | 0.76 | 25.6 | 33.8 | 3.7 |
| 02TEIC01-054           | 355                 | 160 | 13.0                   | 35.8  | 3.8                      | 0.83 | 32.9 | 40.0 | 4.3 |
| 02TEIC01-055           | 291                 | 164 | 14.7                   | 43.3  | 7.1                      | 0.83 | 52.6 | 63.4 | 6.8 |
| 02TEIC01-056           | 268                 | 157 | 19.1                   | 50.0  | 5.9                      | 0.82 | 34.9 | 42.5 | 4.6 |
| 02TEIC01-057           | 254                 | 166 | 13.9                   | 45.8  | 4.8                      | 0.83 | 36.0 | 43.5 | 4.7 |
| 02TEIC01-058           | 367                 | 118 | 15.8                   | 38.2  | 4.0                      | 0.78 | 29.6 | 37.9 | 4.1 |
| 02TEIC01-059           | 152                 | 107 | 9.5                    | 29.7  | 3.0                      | 0.76 | 33.9 | 44.7 | 4.8 |
| <hr/>                  |                     |     |                        |       |                          |      |      |      |     |
| <u>Lone Pine Creek</u> | <u>Elev. 1950 m</u> |     | <u>Lat. 36.57825°N</u> |       | <u>Long. 118.21269°W</u> |      |      |      |     |
| 02TELP05-001           | 206                 | 99  | 16.9                   | 45.6  | 4.9                      | 0.73 | 32.5 | 44.3 | 4.8 |
| 02TELP05-002           | 210                 | 147 | 14.2                   | 41.2  | 3.8                      | 0.80 | 29.0 | 36.0 | 3.9 |
| 02TELP05-003           | 288                 | 141 | 27.3                   | 41.1  | 5.8                      | 0.81 | 28.6 | 35.4 | 3.8 |
| 02TELP05-004           | 331                 | 135 | 13.9                   | 43.3  | 5.0                      | 0.80 | 38.2 | 47.6 | 5.1 |
| 02TELP05-005           | 284                 | 112 | 14.1                   | 40.3  | 4.4                      | 0.76 | 34.5 | 45.1 | 4.9 |
| 02TELP05-006           | 180                 | 100 | 18.0                   | 47.9  | 3.9                      | 0.73 | 24.3 | 33.3 | 3.6 |
| 02TELP05-007           | 182                 | 141 | 16.9                   | 39.0  | 4.6                      | 0.80 | 32.6 | 41.0 | 4.4 |
| 02TELP05-008           | 282                 | 114 | 16.6                   | 57.3  | 5.3                      | 0.77 | 32.6 | 42.6 | 4.6 |
| 02TELP05-009           | 249                 | 135 | 16.5                   | 53.7  | 7.1                      | 0.80 | 44.6 | 56.0 | 6.0 |
| 02TELP05-010           | 177                 | 107 | 13.8                   | 47.7  | 5.4                      | 0.74 | 39.6 | 53.3 | 5.8 |
| 02TELP05-011           | 122                 | 115 | 12.2                   | 37.8  | 3.5                      | 0.74 | 30.9 | 41.6 | 4.5 |
| 02TELP05-012           | 150                 | 128 | 16.2                   | 38.6  | 5.6                      | 0.77 | 40.7 | 52.7 | 5.7 |
| 02TELP05-013           | 210                 | 104 | 76.2                   | 85.7  | 15.5                     | 0.75 | 29.5 | 39.4 | 4.3 |
| 02TELP05-014           | 245                 | 88  | 22.9                   | 48.1  | 4.7                      | 0.71 | 25.2 | 35.5 | 3.8 |
| 02TELP05-015           | 224                 | 109 | 14.7                   | 47.4  | 5.8                      | 0.75 | 40.8 | 54.1 | 5.8 |
| 02TELP05-016           | 345                 | 126 | 16.1                   | 53.4  | 5.0                      | 0.79 | 32.0 | 40.4 | 4.4 |
| 02TELP05-017           | 196                 | 88  | 14.3                   | 48.5  | 4.6                      | 0.70 | 32.8 | 46.8 | 5.1 |
| 02TELP05-018           | 280                 | 129 | 13.9                   | 43.1  | 5.2                      | 0.79 | 39.4 | 49.8 | 5.4 |
| 02TELP05-019           | 320                 | 93  | 20.5                   | 50.6  | 3.7                      | 0.73 | 20.9 | 28.6 | 3.1 |
| 02TELP05-020           | 203                 | 100 | 23.1                   | 60.4  | 7.1                      | 0.70 | 34.7 | 49.3 | 5.3 |
| 02TELP05-021           | 185                 | 93  | 14.5                   | 50.2  | 4.6                      | 0.71 | 32.1 | 44.9 | 4.8 |
| 02TELP05-022           | 113                 | 101 | 18.7                   | 59.1  | 5.9                      | 0.71 | 33.0 | 46.3 | 5.0 |
| 02TELP05-023           | 230                 | 124 | 19.5                   | 54.4  | 11.4                     | 0.78 | 64.6 | 82.8 | 8.9 |
| 02TELP05-024           | 339                 | 82  | 14.0                   | 41.8  | 4.7                      | 0.70 | 36.0 | 51.5 | 5.6 |

|              |     |     |      |      |      |      |      |      |     |
|--------------|-----|-----|------|------|------|------|------|------|-----|
| 02TELP05-025 | 287 | 138 | 15.7 | 41.2 | 1.8  | 0.80 | 13.0 | 16.2 | 1.7 |
| 02TELP05-026 | 365 | 130 | 22.0 | 62.1 | 6.7  | 0.80 | 33.5 | 41.9 | 4.5 |
| 02TELP05-028 | 301 | 123 | 15.2 | 47.7 | 4.7  | 0.78 | 32.4 | 41.2 | 4.5 |
| 02TELP05-029 | 238 | 104 | 16.3 | 50.9 | 9.9  | 0.75 | 64.2 | 85.8 | 9.3 |
| 02TELP05-030 | 290 | 124 | 13.5 | 41.3 | 4.3  | 0.78 | 33.7 | 42.9 | 4.6 |
| 02TELP05-031 | 291 | 103 | 23.0 | 62.8 | 4.9  | 0.75 | 23.7 | 31.6 | 3.4 |
| 02TELP05-032 | 287 | 90  | 16.1 | 41.9 | 2.8  | 0.72 | 19.5 | 27.1 | 2.9 |
| 02TELP05-033 | 174 | 77  | 13.9 | 43.0 | 3.7  | 0.67 | 28.0 | 42.0 | 4.5 |
| 02TELP05-034 | 296 | 94  | 17.3 | 51.3 | 5.2  | 0.73 | 32.7 | 44.7 | 4.8 |
| 02TELP05-035 | 339 | 109 | 18.0 | 57.0 | 7.3  | 0.76 | 42.6 | 55.8 | 6.0 |
| 02TELP05-036 | 283 | 126 | 18.1 | 54.6 | 6.9  | 0.79 | 40.8 | 51.8 | 5.6 |
| 02TELP05-037 | 167 | 116 | 15.7 | 53.3 | 4.3  | 0.76 | 28.0 | 37.0 | 4.0 |
| 02TELP05-038 | 138 | 108 | 21.7 | 47.3 | 5.9  | 0.73 | 33.2 | 45.2 | 4.9 |
| 02TELP05-039 | 212 | 103 | 17.1 | 48.7 | 4.1  | 0.74 | 26.5 | 35.7 | 3.9 |
| 02TELP05-040 | 150 | 95  | 14.7 | 48.3 | 4.1  | 0.71 | 28.7 | 40.4 | 4.4 |
| 02TELP05-041 | 155 | 101 | 18.9 | 58.7 | 1.1  | 0.72 | 6.0  | 8.3  | 0.9 |
| 02TELP05-042 | 160 | 103 | 15.1 | 53.3 | 5.4  | 0.73 | 35.6 | 48.7 | 5.3 |
| 02TELP05-043 | 223 | 127 | 14.4 | 40.9 | 7.9  | 0.78 | 59.9 | 76.5 | 8.3 |
| 02TELP05-044 | 183 | 82  | 19.1 | 54.4 | 5.7  | 0.68 | 32.6 | 47.6 | 5.1 |
| 02TELP05-045 | 180 | 95  | 22.5 | 45.5 | 4.9  | 0.72 | 27.3 | 37.8 | 4.1 |
| 02TELP05-046 | 230 | 115 | 15.4 | 52.2 | 4.6  | 0.76 | 30.5 | 39.9 | 4.3 |
| 02TELP05-047 | 290 | 109 | 14.5 | 45.2 | 4.2  | 0.76 | 30.9 | 40.6 | 4.4 |
| 02TELP05-048 | 258 | 76  | 24.1 | 57.8 | 5.4  | 0.68 | 26.5 | 39.1 | 4.2 |
| 02TELP05-049 | 167 | 94  | 18.5 | 51.7 | 10.4 | 0.71 | 62.0 | 86.8 | 9.4 |
| 02TELP05-050 | 305 | 84  | 18.4 | 56.3 | 5.1  | 0.70 | 29.7 | 42.2 | 4.6 |
| 02TELP05-051 | 419 | 144 | 15.7 | 47.4 | 4.1  | 0.82 | 28.1 | 34.4 | 3.7 |
| 02TELP05-052 | 258 | 110 | 14.0 | 46.2 | 4.2  | 0.76 | 30.6 | 40.3 | 4.4 |
| 02TELP05-053 | 158 | 107 | 14.2 | 50.0 | 5.6  | 0.74 | 39.4 | 53.4 | 5.8 |
| 02TELP05-054 | 310 | 107 | 16.3 | 49.0 | 4.0  | 0.76 | 26.6 | 35.0 | 3.8 |
| 02TELP05-055 | 183 | 89  | 18.2 | 45.9 | 3.8  | 0.71 | 24.2 | 34.3 | 3.7 |

\* Corrected for alpha ejection after Farley et al. (1996)

† 1 $\sigma$  errors are 11% and represent mean uncertainty on reproducibility of bedrock samples (Table DR1).

Table DR3. Kuiper Equality Test results ( $\alpha = 0.05$ ) for comparisons of predicted and measured PDFs from Inyo Creek and Lone Pine Creek catchments

| Sample 1 (Measured PDF) | n1 | Sample 2 (Predicted PDF) | n2  | $V$    | $P$    | H         |
|-------------------------|----|--------------------------|-----|--------|--------|-----------|
| Inyo Creek              | 52 | Inyo Creek               | 52  | 0.1946 | 0.7133 | 1 (0.995) |
| Inyo Creek              | 52 | Inyo Creek               | 100 | 0.1868 | 0.6230 | 1 (0.996) |
| Lone Pine Creek         | 54 | Lone Pine Creek          | 54  | 0.4234 | 0.0074 | 0 (0.030) |
| Lone Pine Creek         | 54 | Lone Pine Creek          | 100 | 0.4206 | 0.0007 | 0 (0.001) |

Kuiper statistic  $V$  and significance level  $P$  of an observed value of  $V$  are calculated for each comparison between sample 1, defined by n1 measured ages, and sample 2, defined by n2 ages selected randomly from the predicted PDF (as a disproof of the null hypothesis that the measured and predicted PDFs are the same).  $H = 1$  indicates that the null hypothesis cannot be disproved at significance level  $\alpha$ , i.e., the samples are statistically similar;  $H = 0$  indicates that samples 1 and 2 are different at significance level  $\alpha$ .  $V$  and  $P$  are mean values of 10,000 Monte Carlo simulations.



Table DR4. Cosmogenic  $^{10}\text{Be}$  concentration and erosion rate for the Inyo Creek catchment

| Sample      | Mass quartz<br>(g) | $^{10}\text{Be}$<br>( $10^5 \text{ atm/g}$ )* | $P_{10}$<br>( $\text{atm/g/yr}$ )† | Erosion rate<br>(mm/yr) | Erosion<br>timescale (yr) |
|-------------|--------------------|-----------------------------------------------|------------------------------------|-------------------------|---------------------------|
| 02TEIC01-Be | 118.16             | $1.73 \pm 0.01$                               | $43.21 \pm 3.1$                    | $0.24 \pm 0.03$         | 3860                      |

\* Uncertainty is  $1\sigma$  analytical uncertainty.

† Mean  $^{10}\text{Be}$  production rate determined by calculating the local production rate, assuming a sea level high-latitude production rate of  $5.1 \pm 0.3 \text{ atm/g/yr}$  (Stone, 2000) scaled for latitude, altitude, and topographic and snow shielding, for each pixel of a 30 m catchment DEM.  $P_{10}$  error is propagated uncertainty in  $^{10}\text{Be}$  production rate (Stone, 2000) and pixel altitude (30 m).
